# Supplementary material
Source: PubMed Central journal article supplement (PMC2802261)
Supplement: NIHMS164554-supplement-01.pdf [file NIHMS164554-supplement-01.pdf]

## METHODS

### Reagents

Recombinant human TNF, IL-1 $\beta$ , IL-4, IL-6, IL-10, IL-13, IL-17, IFN- $\gamma$ , IFN- $\lambda$ 1, oncostatin M (OSM), and TGF- $\beta$  were purchased from R&D systems (Minneapolis, Minn). Peptidoglycan from *Staphylococcus aureus*, polyinosine-polycytidylic acid (dsRNA), LPS from *Escherichia coli*, serotype 0111:B4, recombinant flagellin from *Salmonella typhimurium*, and IFN- $\beta$  were purchased from InvivoGen (San Diego, Calif).

### Cell culture

Human primary nasal epithelial cells (PNECs) were collected from the inferior turbinate or uncinate tissue by curettage with a Rhinoprobe

(Arlington Scientific, Inc, Springville, Utah) under a Northwestern University Feinberg School of Medicine Institutional Review Board–approved human subject research protocol. PNECs were maintained in serum-free bronchial epithelial cell growth medium (BEGM; Cambrex, Walkersville, Md). PNECs were plated in 24-well culture plates coated with collagen (Vitrogen; Collagen Biomaterials, Palo Alto, Calif). Before stimulation, PNECs were cultured in BEGM without hydrocortisone for at least 36 hours. PNECs were stimulated with 10  $\mu$ g/mL peptidoglycan, 25  $\mu$ g/mL dsRNA, 1  $\mu$ g/mL LPS, 10 ng/mL flagellin, 100 ng/mL TNF, 100 ng/mL IL-1 $\beta$ , 100 ng/mL IL-4, 100 ng/mL IL-6, 100 ng/mL IL-10, 100 ng/mL IL-13, 100 ng/mL IL-17, 1000 IU/mL IFN- $\beta$ , 10 ng/mL IFN- $\gamma$ , 100 ng/mL IFN- $\lambda$ 1, 100 ng/mL oncostatin M, or 100 ng/mL TGF- $\beta$  for 6, 24, and 72 hours.

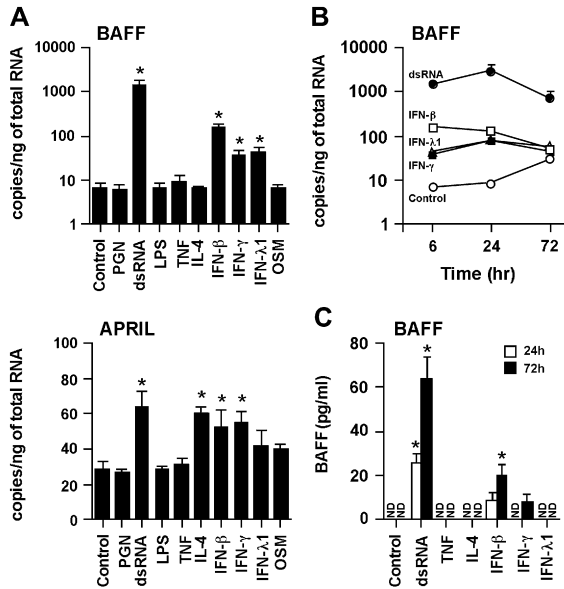

**FIG E1.** Expression of BAFF and APRIL in nasal epithelial cells. **A**, PNECs were incubated for 6 hours with 10  $\mu$ g/mL peptidoglycan (PGN), 25  $\mu$ g/mL dsRNA, 1  $\mu$ g/mL LPS, 100 ng/mL TNF, 100 ng/mL IL-4, 1000 U/mL IFN- $\beta$ , 10 ng/mL IFN- $\gamma$ , 100 ng/mL IFN- $\lambda$ 1, and 100 ng/mL oncostatin M (OSM) as indicated, and then mRNA was extracted and analyzed for BAFF and APRIL using real-time PCR. The mRNA expression levels were normalized to the median expression of the housekeeping gene, ACTB. **B**, PNECs were incubated with dsRNA, 1000 U/mL IFN- $\beta$ , 10 ng/mL IFN- $\gamma$ , 100 ng/mL IFN- $\lambda$ 1, or vehicle control (medium) for 6 to 72 hours, and then expression of mRNA for BAFF was analyzed by real-time PCR. **C**, Detection of BAFF protein by ELISA in the culture supernatant of PNECs stimulated with dsRNA and cytokines for 24 or 72 hours. Results shown are means  $\pm$  SEMs of 4 to 7 independent experiments. ND, Not detectable. \* $P < .05$ .
